# Supplementary material for: Tales of diversity: Genomic and morphological characteristics of forty-six Arthrobacter phages
Source: PubMed Central journal article supplement (PMC5513430; doi:10.1371/journal.pone.0180517), 2017-07-17
Supplement: pone.0180517.s002.pdf [file pone.0180517.s002.pdf]

# Cluster AK

Bennie

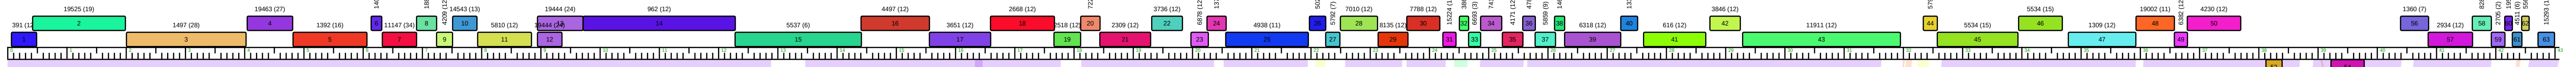

DrRobert

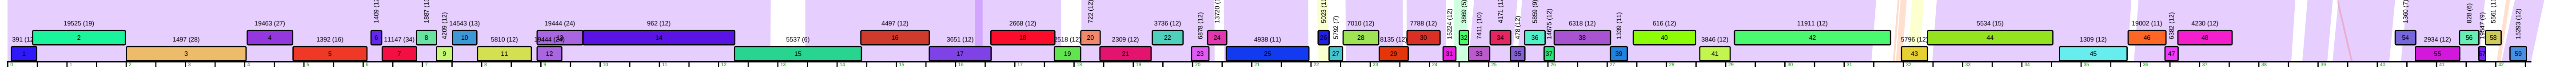

Glenn

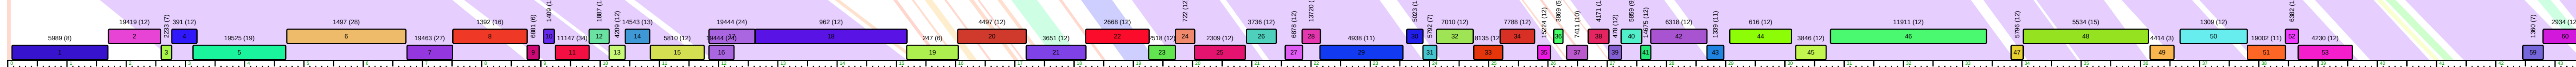

HunterDalle

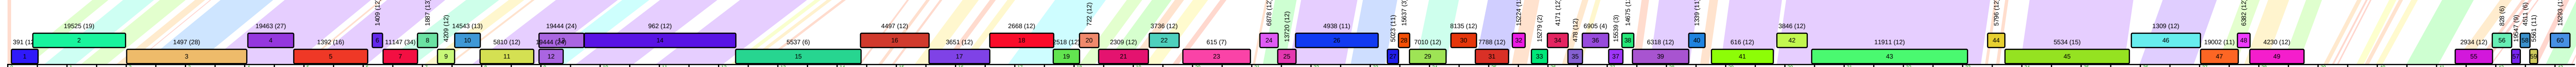

Immaculate

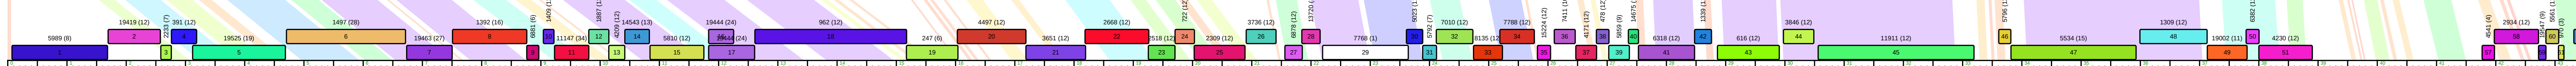

Joann

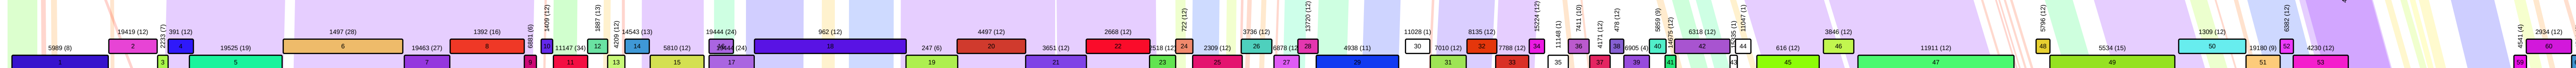

Korra

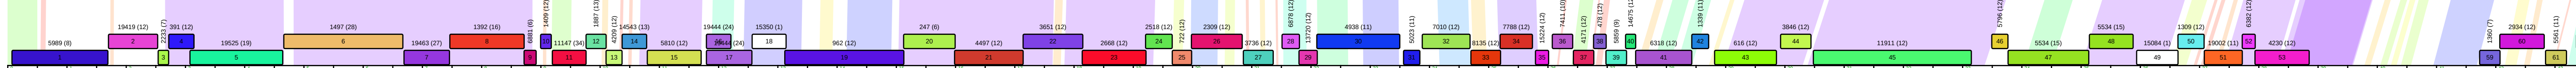

Pumancara

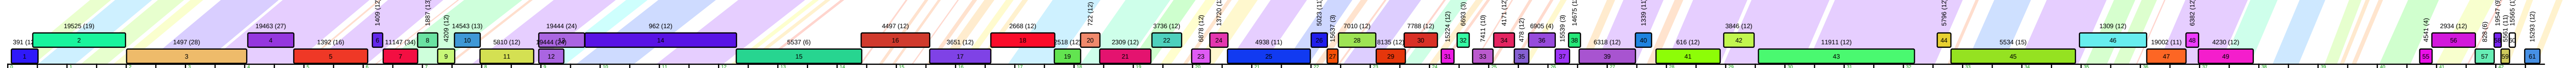

RAP15

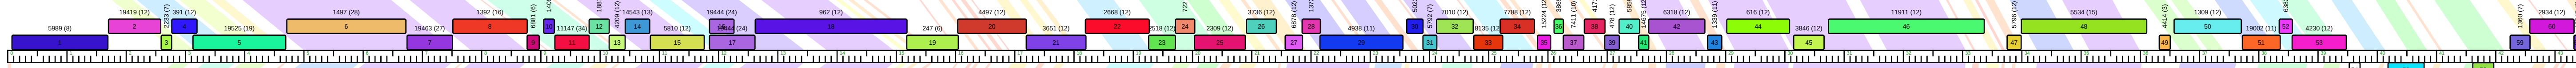

Vulture

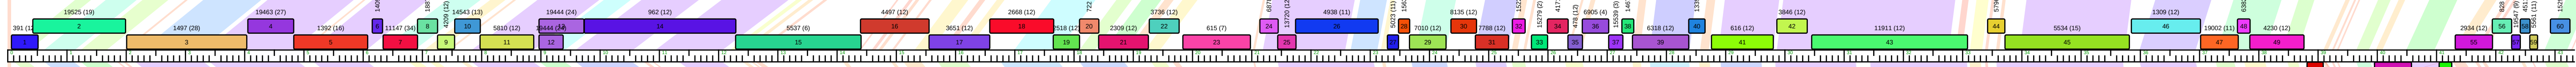

Wayne

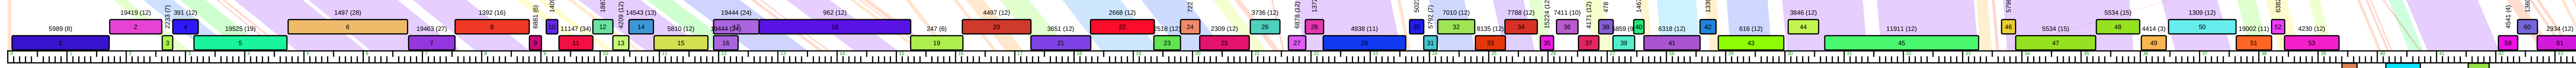

S2 Figure. Pairwise alignment of 11 Cluster AK *Arthrobacter* phages. See Figure 4 for details.
