# Supplementary material for: Tales of diversity: Genomic and morphological characteristics of forty-six Arthrobacter phages
Source: PubMed Central journal article supplement (PMC5513430; doi:10.1371/journal.pone.0180517), 2017-07-17
Supplement: pone.0180517.s004.pdf [file pone.0180517.s004.pdf]

# Cluster AM

Circum

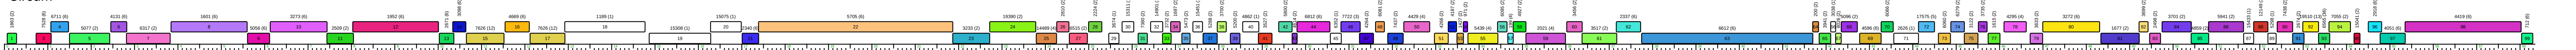

Mudcat

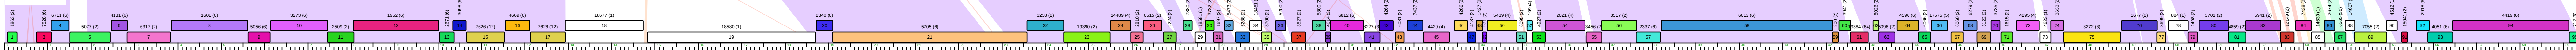

# Cluster AU

CapnMurica

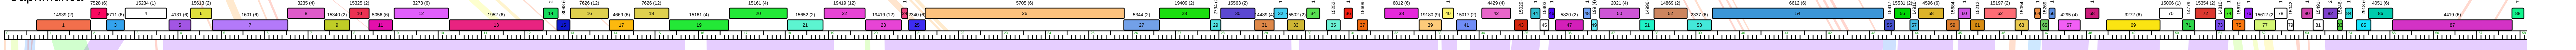

Gordon

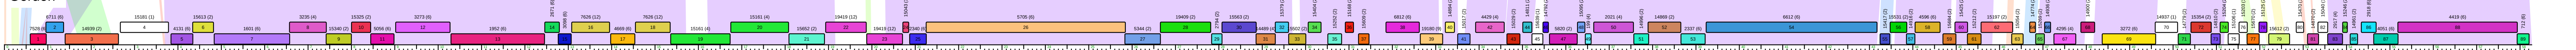

S4 Figure. Pairwise alignment of 2 Cluster AM and 2 Cluster AU *Arthrobacter* phages. See Figure 4 for details.
