# Supplementary material for: Tales of diversity: Genomic and morphological characteristics of forty-six Arthrobacter phages
Source: PubMed Central journal article supplement (PMC5513430; doi:10.1371/journal.pone.0180517), 2017-07-17
Supplement: pone.0180517.s006.pdf [file pone.0180517.s006.pdf]

# Cluster AO

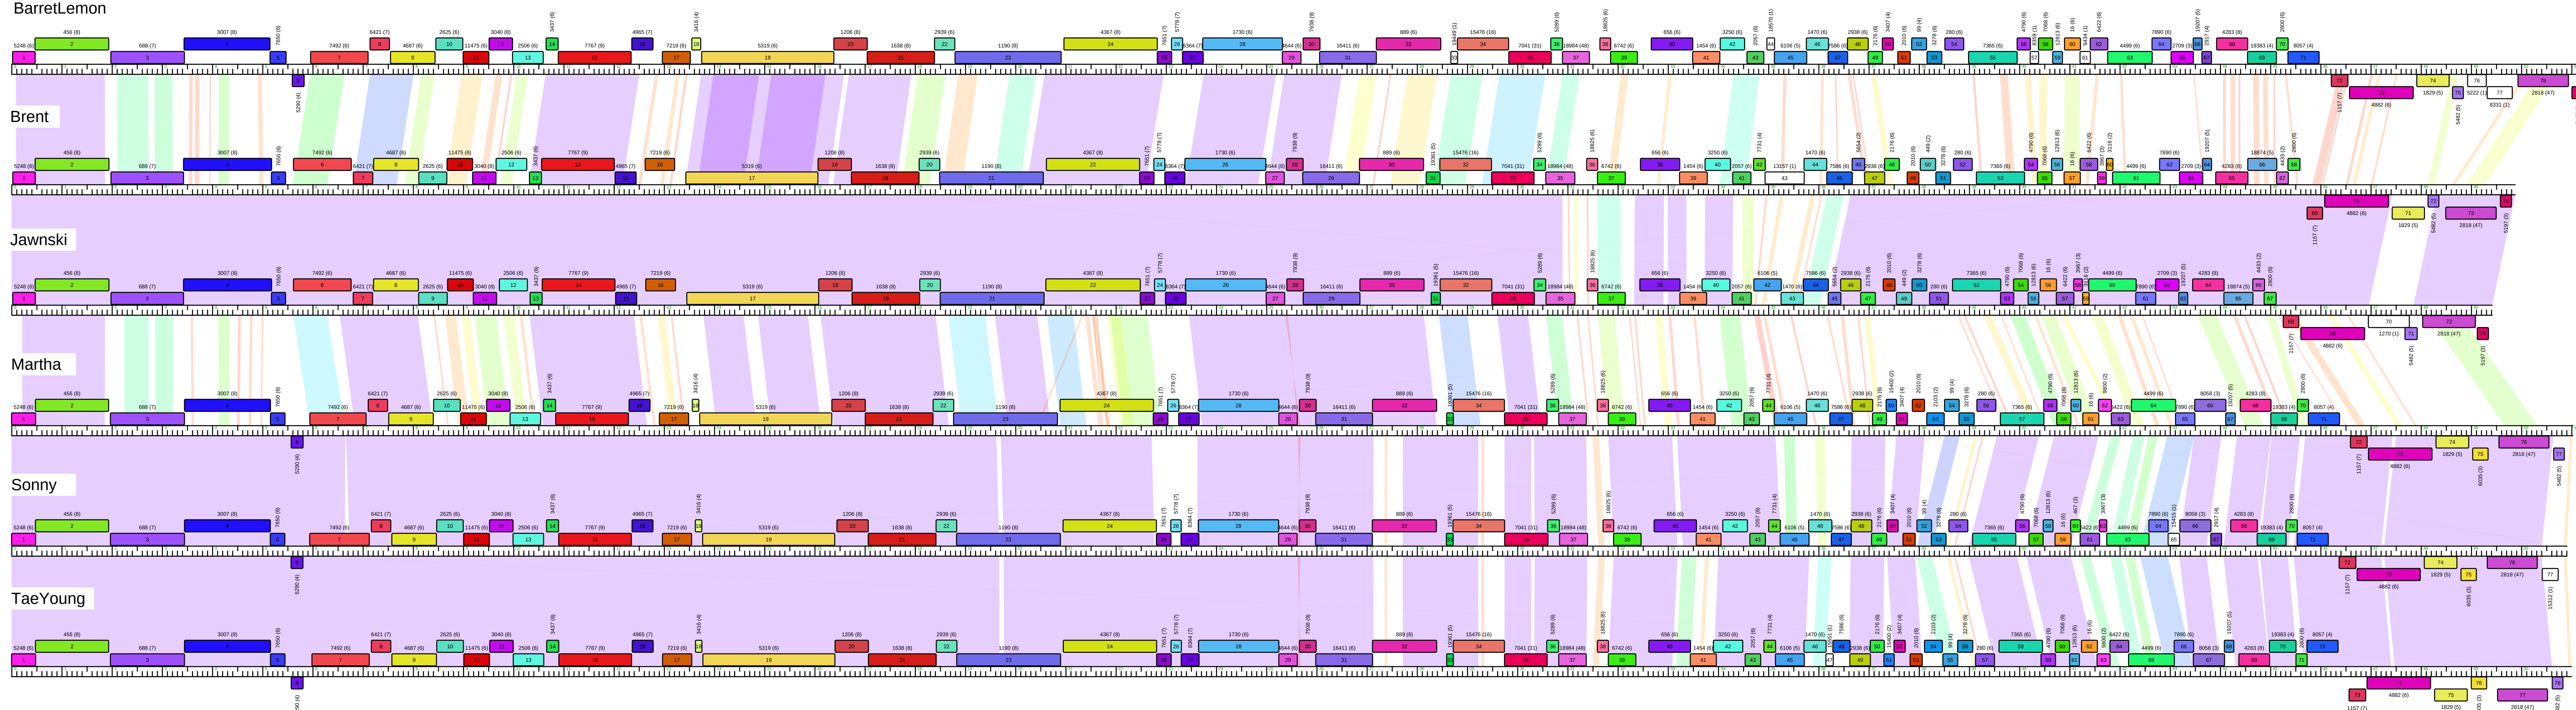

S6 Figure. Pairwise alignment of 6 Cluster AO *Arthrobacter* phages. See Figure 4 for details.
