# Supplementary material for: Tales of diversity: Genomic and morphological characteristics of forty-six Arthrobacter phages
Source: PubMed Central journal article supplement (PMC5513430; doi:10.1371/journal.pone.0180517), 2017-07-17

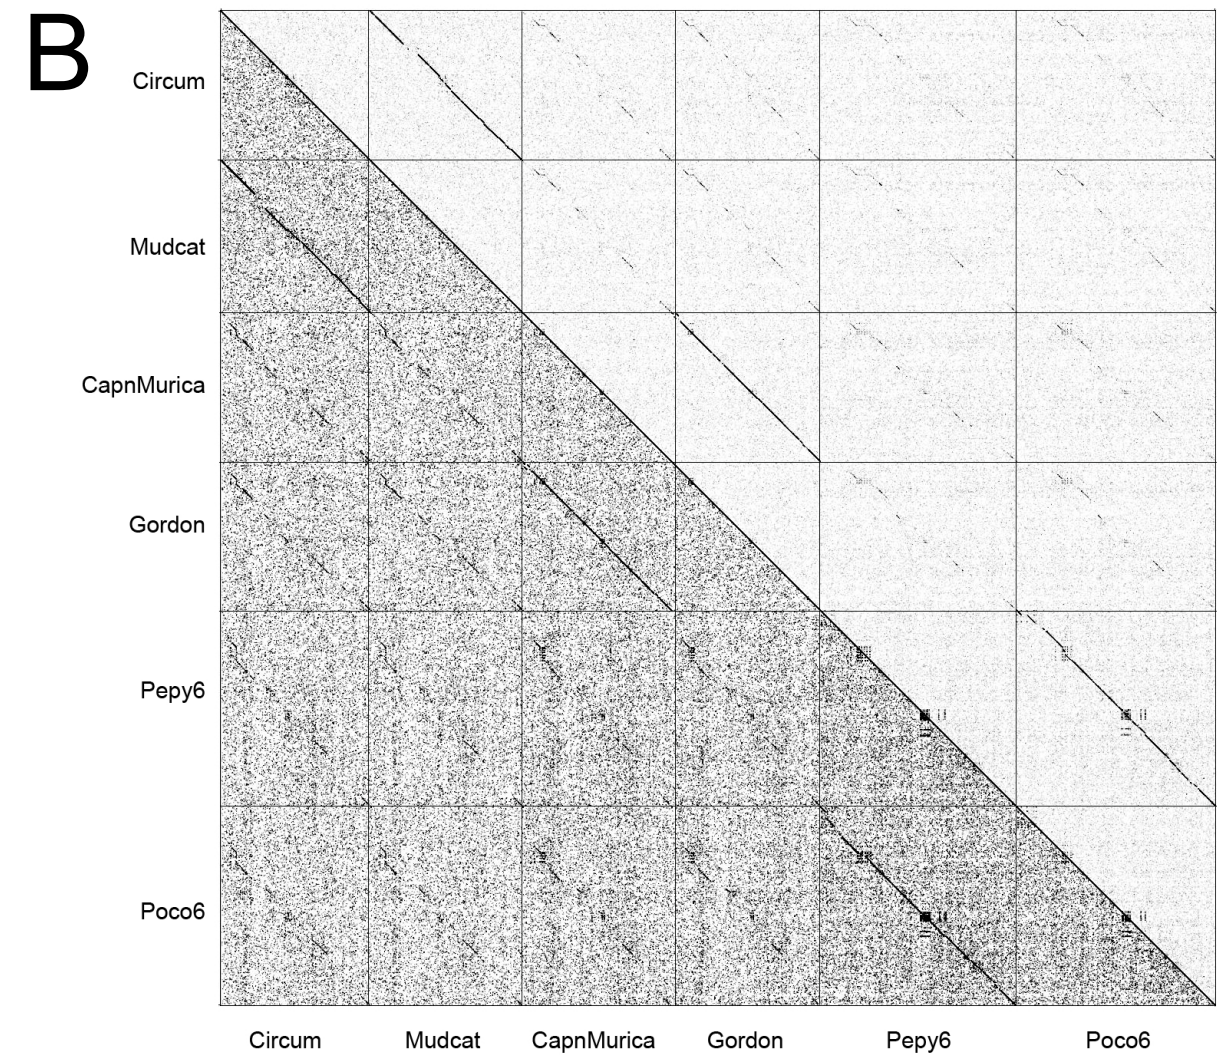

**S10 Figure. Relationship between Clusters AM, AU, and CC. A.** Pairwise alignment of *Arthrobacter* phages Circum (Cluster AM), Gordon (Cluster AU), and *Rhodococcus* phages Pepy6 and POCO6 (Cluster CC), displayed using Phamerator. See Figure 4 for details. Asterisks designate transmembrane proteins. **B.** Dotplot showing nucleotide comparisons of phages Circum and Mudcat (Cluster AM), Gordon and CapnMurica (Cluster AU), and Pepy6 and POCO6 (Cluster CC). See Figure 4 for details.

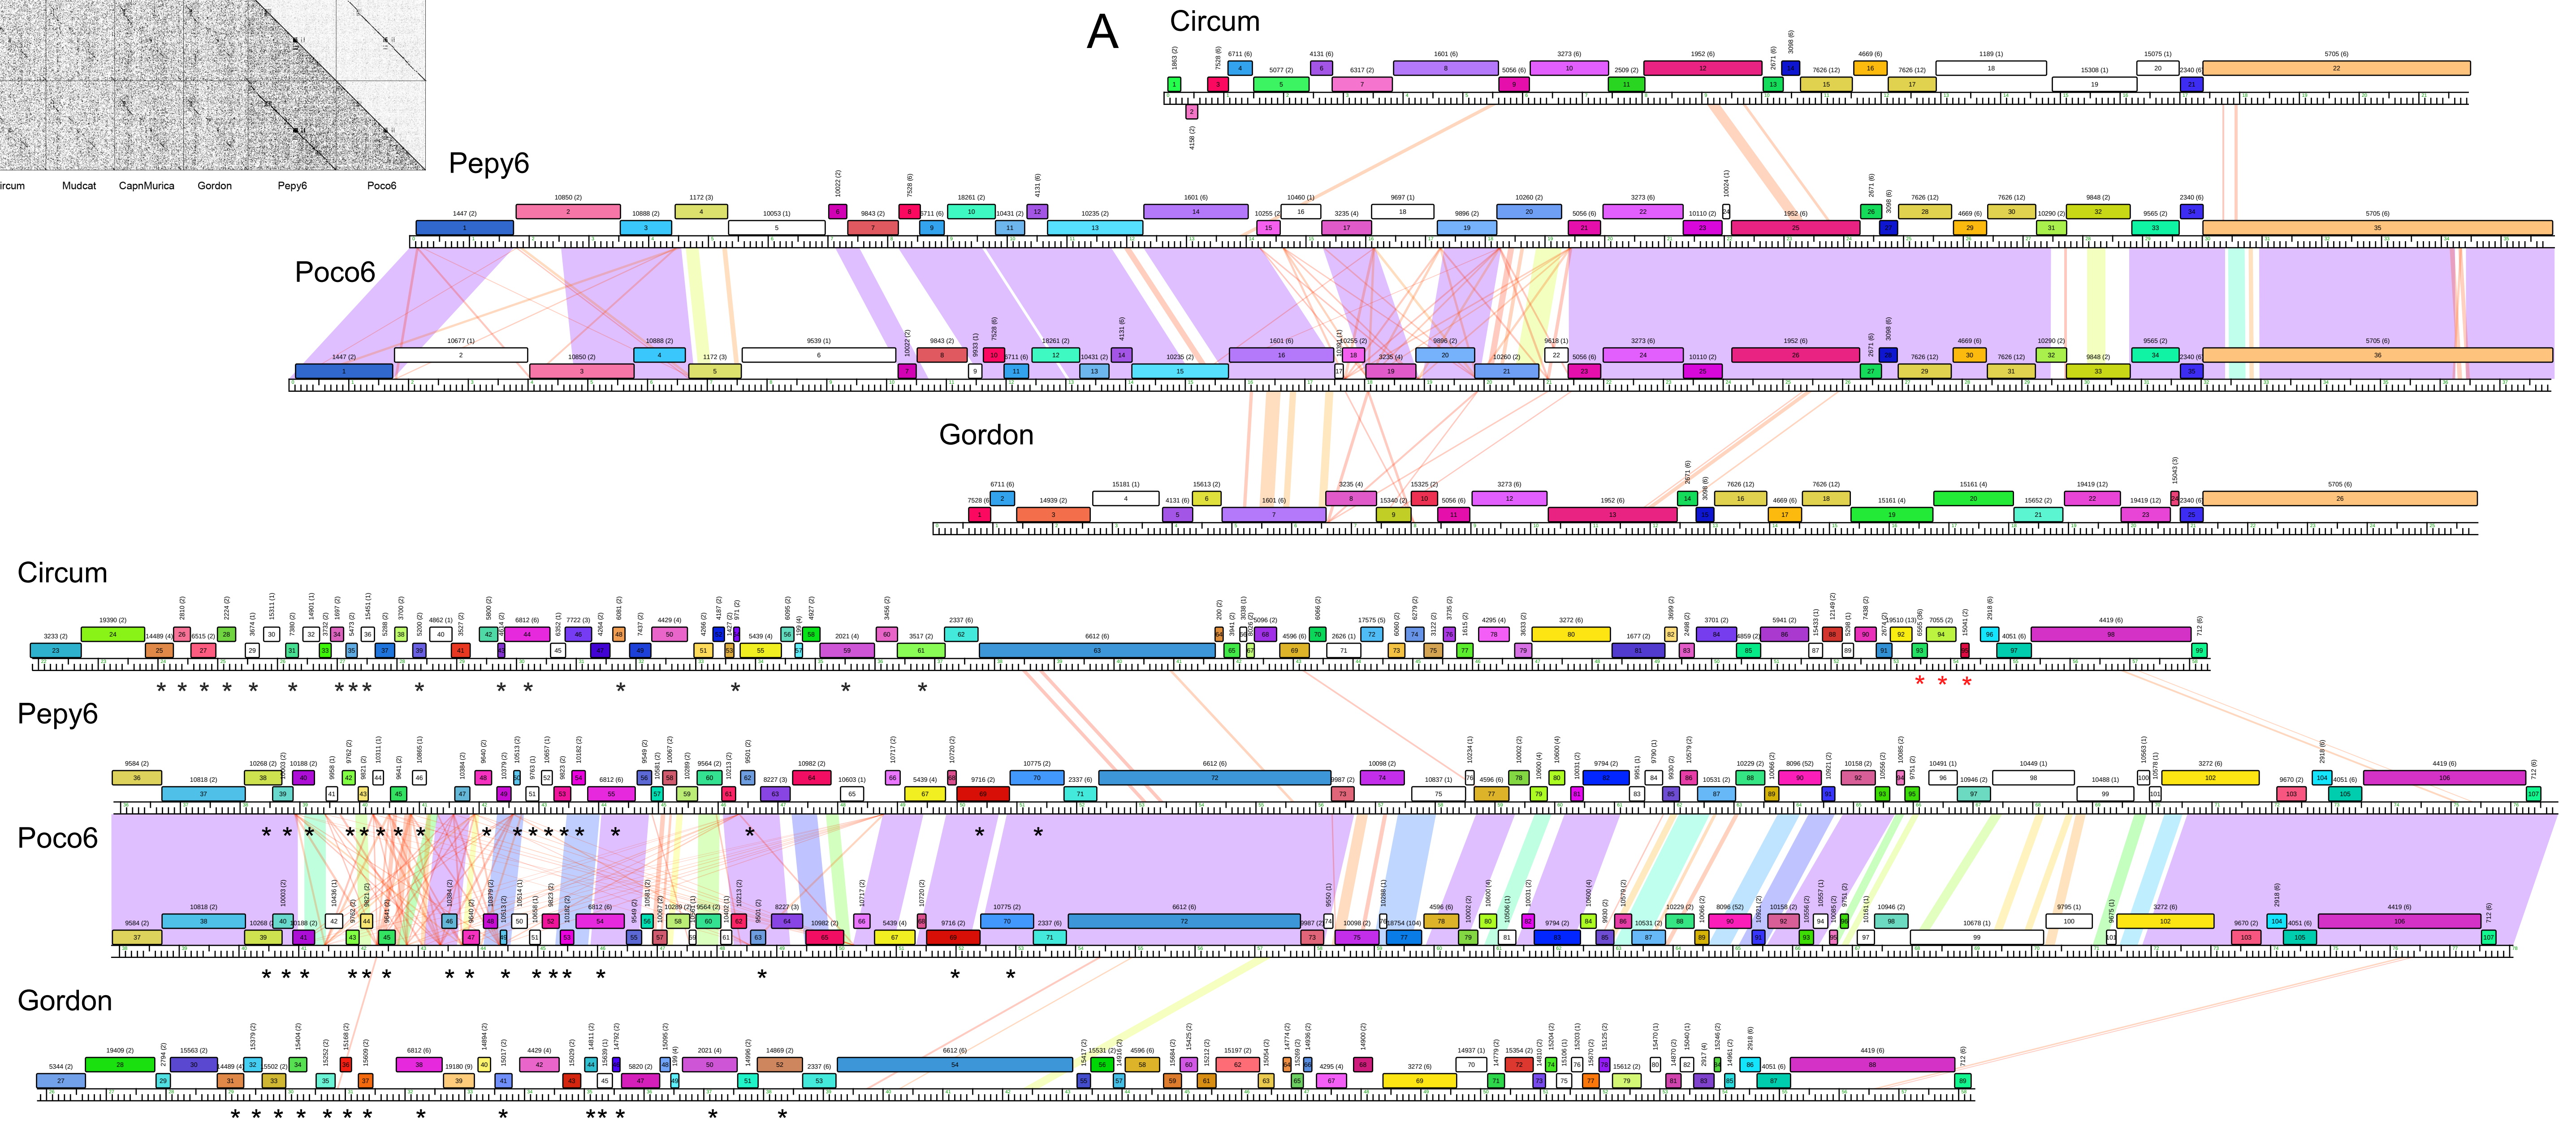

Supplement: pone.0180517.s010.pdf [file pone.0180517.s010.pdf]
