# Supplementary material for: Tales of diversity: Genomic and morphological characteristics of forty-six Arthrobacter phages
Source: PubMed Central journal article supplement (PMC5513430; doi:10.1371/journal.pone.0180517), 2017-07-17
Supplement: pone.0180517.s011.pdf [file pone.0180517.s011.pdf]

**Table S1: Sample Locations & Permissions**

| <b>Phage</b>  | <b>Location</b>                     | <b>Permit/permissions</b> |
|---------------|-------------------------------------|---------------------------|
| Amigo         | Private home, Spring, Tx            | permission granted        |
| Anansi        | Private home, Phoenixville, PA      | permission granted        |
| BarretLemon   | private home, Chippewa Falls, WI    | permission granted        |
| Bennie        | South Park, PA                      | no permit required        |
| Brent         | private home, Broomall, PA          | Permission granted        |
| CapnMurica    | Carnegie Mellon University          | no permission needed      |
| Circum        | U of North Texas                    | no permission needed      |
| Decurro       | public property, Lewisburg, PA      | no permit required        |
| DrRobert      | U of Pittsburgh                     | no permission needed      |
| Galaxy        | Seneca Valley High School           | no permission needed      |
| Glenn         | U of Pittsburgh                     | no permission needed      |
| Gordon        | South Park, PA                      | no permit required        |
| Gorgeous      | Private home, Lafayette Hill, PA    | permission granted        |
| HunterDalle   | public property, Laurel Springs, NJ | no permit required        |
| Immaculata    | Immaculata University               | no permission needed      |
| Jasmine       | Schenley Park, Pittsburgh PA        | no permit required        |
| Jawnski       | Schenley Park, Pittsburgh PA        | no permit required        |
| Jessica       | public property, Lewisburg, PA      | no permit required        |
| Joann         | private property, Clayton, OK       | permission granted        |
| KelleZio      | public property, Burkesville, KY    | no permit required        |
| Kitkat        | private home, Greenbrae, CA         | permission granted        |
| Korra         | Overlook Park, Bethel Park, PA      | no permit required        |
| Laroye        | U of Pittsburgh                     | no permission needed      |
| Maggie        | Lehigh University                   | no permission needed      |
| Martha        | private property, Pittsburgh, PA    | permission granted        |
| Moloch        | public space, Pittsburgh, PA        | no permit required        |
| Mudcat        | public property, Central City, KY   | no permit required        |
| Muttlie       | private home, West Chester, PA      | permission granted        |
| Preamble      | private property, Radnor, PA        | permission granted        |
| PrincessTrina | private home, Laurel Springs, NJ    | permission granted        |
| Pumancara     | private property, Pittsburgh, PA    | permission granted        |
| RAP15         | private property, Pittsburgh, PA    | permission granted        |
| Rings         | public park, Radnor, PA             | no permit required        |
| Salgado       | U of Pittsburgh                     | no permission needed      |
| Sandman       | public beach, Seaside Heights, NJ   | no permit required        |
| Sonny         | U of Pittsburgh                     | no permission needed      |
| SorJuana      | public property, Royersford, PA     | no permit required        |
| Stratus       | public space, Radnor, PA            | no permit required        |
| TaeYoung      | U of Pittsburgh                     | no permission needed      |
| Tank          | Saint Joseph's Univ                 | no permission needed      |
| Toulouse      | private home, Hudson, WI            | permission granted        |
| TymAbreu      | private home, Hudson, WI            | permission granted        |
| Vulture       | public property, Marlton, NJ        | no permit required        |
| Wayne         | private home, N. Huntingdon, PA     | permission granted        |
| Wilde         | private home, Montclair, NJ         | permission granted        |
| Yank          | public property, Lewisburg, PA      | no permit required        |
