# Supplementary material for: Tales of diversity: Genomic and morphological characteristics of forty-six Arthrobacter phages
Source: PubMed Central journal article supplement (PMC5513430; doi:10.1371/journal.pone.0180517), 2017-07-17
Supplement: pone.0180517.s012.pdf [file pone.0180517.s012.pdf]

**Supplementary Table S2: Measurements of virion head diameters and tail lengths**

| <b>Phage</b>  | <b>Length</b> | <b>Cluster</b> | <b>Head (nm)</b>    | <b>Tail (nm)</b> |
|---------------|---------------|----------------|---------------------|------------------|
| Bennie        | 43074         | AK             | 56.8±1.4            | 130.3±9.3        |
| Laroye        | 60005         | AL             | 56.4±1.5            | 133.6±6.1        |
| Circum        | 58353         | AM             | 73.7±1.3 x 50.5±2.2 | 228.1±4.0        |
| Maggie        | 15556         | AN             | 37.6±2.3            | 96.4±5.8         |
| Jawnski       | 49149         | AO1            | 54.3±6.4            | 117.4±6.2        |
| Martha        | 51027         | AO2            | 58.4±1.9            | 118.0±9.2        |
| Wilde         | 68203         | AP             | 62.2±1.5            | 236.1±1.0        |
| Amigo         | 59173         | AQ             | 61.4±1.7            | 242.3±13.3       |
| KitKat        | 58560         | AT             | 61.4±2.4            | 149.6±11.5       |
| Gordon        | 58279         | AU             | 58.8±5.3            | 237.6±12.9       |
| PrincessTrina | 70265         | AR             | 57.5±1.4            | 176.8±17.5       |
| Galaxy        | 37809         | Singleton      | 55.1±3.4            | 120.2±7.9        |
| Jasmine       | 46723         | Singleton      | 59.8±2.9            | 10.3±0.9         |
