# Supplementary material for: Tales of diversity: Genomic and morphological characteristics of forty-six Arthrobacter phages
Source: PubMed Central journal article supplement (PMC5513430; doi:10.1371/journal.pone.0180517), 2017-07-17
Supplement: pone.0180517.s015.pdf [file pone.0180517.s015.pdf]

Table S5. Phams shared between Arthrobacter phage clusters

| pham  | # members | # Arthro members | shared clusters        | representative gene      | function                            | Number of phages in each cluster containing pham |    |    |    |    |    |    |    |    |    |   | Galaxy | Jasmine | ArV2 |   |   |
|-------|-----------|------------------|------------------------|--------------------------|-------------------------------------|--------------------------------------------------|----|----|----|----|----|----|----|----|----|---|--------|---------|------|---|---|
|       |           |                  |                        |                          |                                     | AK                                               | AL | AM | AN | AO | AP | AQ | AR | AT | AU |   |        |         |      |   |   |
|       |           |                  |                        | # of cluster members:    |                                     | 12                                               | 2  | 2  | 10 | 6  | 2  | 5  | 2  | 2  | 2  | 2 | 1      | 1       | 1    |   |   |
| 199   | 4         | 4                | AM, AU                 | Circum_gp57              | NKF <sup>1</sup>                    |                                                  |    | 2  |    |    |    |    |    |    |    |   |        |         |      | 2 |   |
| 456   | 8         | 8                | AO, AR                 | Jawnski_gp2              | terminase, large subunit            |                                                  |    |    |    | 6  |    |    |    | 2  |    |   |        |         |      |   |   |
| 467   | 3         | 3                | AO, AT                 | KitKat_gp94              | NKF                                 |                                                  |    |    |    | 1  |    |    |    |    |    | 2 |        |         |      |   |   |
| 712   | 6         | 4                | AM, AU                 | Circum_gp99              | NKF                                 |                                                  |    |    | 2  |    |    |    |    |    |    |   |        |         |      |   | 2 |
| 1190  | 8         | 8                | AO, AR                 | Jawnski_gp21             | minor tail                          |                                                  |    |    |    | 6  |    |    |    | 2  |    |   |        |         |      |   |   |
| 1206  | 8         | 8                | AO, AR                 | Jawnski_gp18             | LysM domain                         |                                                  |    |    |    | 6  |    |    |    | 2  |    |   |        |         |      |   |   |
| 1601  | 6         | 4                | AM, AU                 | Circum_gp8               | terminase, large subunit            |                                                  |    |    | 2  |    |    |    |    |    |    |   |        |         |      |   | 2 |
| 1887  | 13        | 13               | AK, Galaxy             | Korra_gp12               | NKF                                 |                                                  | 12 |    |    |    |    |    |    |    |    |   |        |         |      |   | 1 |
| 1952  | 6         | 4                | AM, AU                 | Circum_gp12              | capsid & capsid maturation protease |                                                  |    |    | 2  |    |    |    |    |    |    |   |        |         |      |   | 2 |
| 2021  | 4         | 4                | AM, AU                 | Circum_gp59              | NKF                                 |                                                  |    |    | 2  |    |    |    |    |    |    |   |        |         |      |   | 2 |
| 2233  | 7         | 7                | AK, AL                 | Korra_gp3                | NKF                                 |                                                  | 6  | 1  |    |    |    |    |    |    |    |   |        |         |      |   |   |
| 2337  | 6         | 4                | AM, AU                 | Circum_gp62              | NKF                                 |                                                  |    |    | 2  |    |    |    |    |    |    |   |        |         |      |   | 2 |
| 2340  | 6         | 4                | AM, AU                 | Circum_gp21              | NKF                                 |                                                  |    |    | 2  |    |    |    |    |    |    |   |        |         |      |   | 2 |
| 2671  | 6         | 4                | AM, AU                 | Circum_gp13              | NKF                                 |                                                  |    |    | 2  |    |    |    |    |    |    |   |        |         |      |   | 2 |
| 2917  | 4         | 4                | AO, AU                 | Sonny_gp67               | NKF                                 |                                                  |    |    |    | 2  |    |    |    |    |    |   |        |         |      |   | 2 |
| 2918  | 6         | 4                | AM, AU                 | Circum_gp96              | hydrolase                           |                                                  |    |    | 2  |    |    |    |    |    |    |   |        |         |      |   | 2 |
| 3007  | 8         | 8                | AO, AR                 | Jawnski_gp4              | NKF                                 |                                                  |    |    |    | 6  |    |    |    | 2  |    |   |        |         |      |   |   |
| 3040  | 8         | 8                | AO, AR                 | Jawnski_gp11             | NKF                                 |                                                  |    |    |    | 6  |    |    |    | 2  |    |   |        |         |      |   |   |
| 3098  | 6         | 4                | AM, AU                 | Circum_gp14              | NKF                                 |                                                  |    |    | 2  |    |    |    |    |    |    |   |        |         |      |   | 2 |
| 3272  | 6         | 4                | AM, AU                 | Circum_gp80              | ATP-dependent helicase              |                                                  |    |    | 2  |    |    |    |    |    |    |   |        |         |      |   | 2 |
| 3273  | 6         | 4                | AM, AU                 | Circum_gp10              | portal                              |                                                  |    |    | 2  |    |    |    |    |    |    |   |        |         |      |   | 2 |
| 4051  | 6         | 4                | AM, AU                 | Circum_gp97              | NKF                                 |                                                  |    |    | 2  |    |    |    |    |    |    |   |        |         |      |   | 2 |
| 4131  | 6         | 4                | AM, AU                 | Circum_gp6               | NKF                                 |                                                  |    |    | 2  |    |    |    |    |    |    |   |        |         |      |   | 2 |
| 4206  | 12        | 12               | AL, AL                 | Korra_gp55               | HTH DNA binding domain              |                                                  | 10 | 2  |    |    |    |    |    |    |    |   |        |         |      |   |   |
| 4283  | 8         | 8                | AO, AR                 | Jawnski_gp64             | NKF                                 |                                                  |    |    |    | 6  |    |    |    | 2  |    |   |        |         |      |   |   |
| 4295  | 4         | 4                | AM, AU                 | Circum_gp78              | HNH endonuclease                    |                                                  |    |    | 2  |    |    |    |    |    |    |   |        |         |      |   | 2 |
| 4367  | 8         | 8                | AO, AR                 | Jawnski_gp22             | minor tail                          |                                                  |    |    |    | 6  |    |    |    | 2  |    |   |        |         |      |   |   |
| 4419  | 6         | 4                | AM, AU                 | Circum_gp98              | HTH DNA binding domain              |                                                  |    |    | 2  |    |    |    |    |    |    |   |        |         |      |   | 2 |
| 4429  | 4         | 4                | AM, AU                 | Circum_gp50              | NKF                                 |                                                  |    |    | 2  |    |    |    |    |    |    |   |        |         |      |   | 2 |
| 4596  | 6         | 4                | AM, AU                 | Circum_gp69              | NKF                                 |                                                  |    |    | 2  |    |    |    |    |    |    |   |        |         |      |   | 2 |
| 4669  | 6         | 4                | AM, AU                 | Circum_gp16              | NKF                                 |                                                  |    |    | 2  |    |    |    |    |    |    |   |        |         |      |   | 2 |
| 5056  | 6         | 4                | AM, AU                 | Circum_gp9               | NKF                                 |                                                  |    |    | 2  |    |    |    |    |    |    |   |        |         |      |   | 2 |
| 5705  | 6         | 4                | AM, AU                 | Circum_gp22              | tape measure                        |                                                  |    |    | 2  |    |    |    |    |    |    |   |        |         |      |   | 2 |
| 6565  | 36        | 5                | AM, AP, Jasmine        | Circum_gp93              | NKF                                 |                                                  |    |    | 2  |    |    | 2  |    |    |    |   |        |         |      |   |   |
| 6612  | 6         | 4                | AM, AU                 | Circum_gp6               | NKF                                 |                                                  |    |    | 2  |    |    |    |    |    |    |   |        |         |      |   | 2 |
| 6711  | 6         | 4                | AM, AU                 | Circum_gp4               | HNH endonuclease domain             |                                                  |    |    | 2  |    |    |    |    |    |    |   |        |         |      |   | 2 |
| 6812  | 6         | 4                | AM, AU                 | Circum_gp44              | NKF                                 |                                                  |    |    | 2  |    |    |    |    |    |    |   |        |         |      |   | 2 |
| 7135  | 3         | 3                | AL, Jasmine            | Laroye_gp71              | NKF                                 |                                                  |    | 2  |    |    |    |    |    |    |    |   |        |         |      |   | 1 |
| 7528  | 6         | 4                | AM, AU                 | Circum_gp3               | NKF                                 |                                                  |    |    | 2  |    |    |    |    |    |    |   |        |         |      |   | 2 |
| 7626  | 12        | 8                | AM, AU                 | Circum_gp15, Circum_gp17 | major tail                          |                                                  |    |    | 4  |    |    |    |    |    |    |   |        |         |      |   | 4 |
| 7651  | 7         | 7                | AO, AR                 | Jawnski_gp23             | NKF                                 |                                                  |    |    |    | 6  |    |    |    | 1  |    |   |        |         |      |   |   |
| 7767  | 9         | 8                | AO, AR                 | Jawnski_gp14             | tail sheath                         |                                                  |    |    |    | 6  |    |    |    | 2  |    |   |        |         |      |   |   |
| 7938  | 9         | 8                | AO, AR                 | Jawnski_gp28             | NKF                                 |                                                  |    |    |    | 6  |    |    |    | 2  |    |   |        |         |      |   |   |
| 8364  | 7         | 7                | AO, AR                 | Jawnski_gp25             | holin                               |                                                  |    |    |    | 6  |    |    |    | 1  |    |   |        |         |      |   |   |
| 10782 | 3         | 3                | AR, AT                 | PrincessTrina_gp67       | NKF                                 |                                                  |    |    |    |    |    |    |    | 2  |    |   |        |         |      |   | 1 |
| 11716 | 3         | 3                | AR, AT                 | KitKat_gp50              | NKF                                 |                                                  |    |    |    |    |    |    |    | 1  |    |   |        |         |      |   | 2 |
| 12887 | 8         | 2                | Galaxy, ArV2           | Galaxy_gp55              | Nkf                                 |                                                  |    |    |    |    |    |    |    |    |    |   |        |         |      |   | 1 |
| 14489 | 4         | 4                | AM, AU                 | Circum_gp25              | NKF                                 |                                                  |    |    | 2  |    |    |    |    |    |    |   |        |         |      |   | 2 |
| 15043 | 3         | 3                | AL, AU                 | Salgado_gp30             | NKF                                 |                                                  |    | 1  |    |    |    |    |    |    |    |   |        |         |      |   | 2 |
| 18984 | 48        | 13               | AL, AO, AP, AR, Galaxy | Laroye_gp14              | ssDNA binding domain                |                                                  |    |    |    | 6  | 2  |    |    | 2  |    |   |        |         |      |   | 1 |
| 19138 | 7         | 7                | AL, AQ                 | Laroye_gp10              | terminase, large subunit            |                                                  |    |    |    |    |    |    |    |    |    |   |        |         |      |   |   |
| 19180 | 9         | 3                | AK, AU                 | Joann_gp51               | NKF                                 |                                                  | 1  |    |    |    |    |    |    |    |    |   |        |         |      |   | 2 |
| 19419 | 12        | 12               | AK, AL, AU             | Korra_gp2                | NKF                                 |                                                  | 6  | 2  |    |    |    |    |    |    |    |   |        |         |      |   | 4 |
| 19463 | 27        | 13               | AK, Galaxy             | Korra_gp7                | capsid maturation protease          |                                                  | 12 |    |    |    |    |    |    |    |    |   |        |         |      |   | 1 |
| 19525 | 19        | 13               | AK, Galaxy             | Korra_gp5                | terminase, large subunit            |                                                  | 12 |    |    |    |    |    |    |    |    |   |        |         |      |   | 1 |
| 19560 | 2         | 2                | AR, AT                 | KellEzio_gp88            | hydrolase domain                    |                                                  |    |    |    |    |    |    |    |    | 1  | 1 |        |         |      |   |   |

<sup>1</sup>NKF, No known function
