# Supplementary material for: Tales of diversity: Genomic and morphological characteristics of forty-six Arthrobacter phages
Source: PLoS One. 2017 Jul 17;12(7):e0180517. doi: 10.1371/journal.pone.0180517 (PMC5513430; doi:10.1371/journal.pone.0180517)
Supplement: S3 Table — (XLSX) [file pone.0180517.s013.xlsx]

## Sheet: Sheet1
Table S3: Average Nucleotide Identity of 48 Arthrobacter phages
Cluster:	AK												AL		AM		AN										AO						AP		AQ					AR		AT		AU		Singletons
Phage	Bennie	DrRobert	Preamble	HunterDalle	Pumancara	Vulture	Glenn	Immaculata	Korra	RAP15	Joann	Wayne	Laroye	Salgado	Circum	Mudcat	Decurro	Jessica	Maggie	Muttlie	TymAbreu	Moloch	Sandman	Stratus	Toulouse	Yank	Brent	Jawnski	Martha	Sonny	TaeYoung	BarretLemon	Tank	Wilde	Amigo	Rings	Anansi	Gorgeous	Sorjuana	ArV1	PrincessTrina	KellEzio	Kitkat	CapnMurica	Gordon	ArV2	Galaxy	Jasmine
Bennie	1	0.883	0.864	0.778	0.783	0.778	0.856	0.859	0.858	0.859	0.784	0.81	0.545	0.537	0.49	0.467	0.529	0.531	0.528	0.534	0.527	0.53	0.527	0.528	0.526	0.529	0.542	0.54	0.542	0.545	0.54	0.531	0.543	0.547	0.521	0.52	0.522	0.525	0.525	0.531	0.529	0.539	0.552	0.513	0.522	0.524	0.57	0.482
DrRobert		1	0.854	0.774	0.781	0.774	0.86	0.859	0.863	0.862	0.784	0.806	0.539	0.539	0.491	0.489	0.528	0.547	0.523	0.537	0.543	0.532	0.534	0.532	0.534	0.532	0.535	0.527	0.539	0.54	0.538	0.527	0.531	0.534	0.512	0.513	0.515	0.511	0.511	0.525	0.52	0.541	0.544	0.505	0.5	0.513	0.578	0.486
Preamble			1	0.777	0.781	0.777	0.837	0.835	0.838	0.838	0.779	0.805	0.548	0.549	0.49	0.477	0.516	0.519	0.517	0.515	0.519	0.518	0.519	0.518	0.518	0.515	0.53	0.536	0.537	0.534	0.535	0.533	0.525	0.532	0.512	0.512	0.513	0.514	0.514	0.53	0.523	0.546	0.559	0.51	0.508	0.533	0.564	0.492
HunterDalle				1	0.847	1	0.775	0.774	0.774	0.773	0.763	0.777	0.541	0.541	0.491	0.477	0.533	0.529	0.528	0.528	0.528	0.528	0.529	0.528	0.521	0.533	0.534	0.532	0.545	0.538	0.544	0.542	0.546	0.543	0.522	0.518	0.524	0.524	0.524	0.532	0.525	0.541	0.545	0.498	0.503	0.528	0.564	0.48
Pumancara					1	0.847	0.785	0.781	0.782	0.781	0.769	0.771	0.536	0.54	0.497	0.483	0.528	0.526	0.535	0.536	0.535	0.538	0.533	0.538	0.533	0.532	0.534	0.537	0.543	0.535	0.534	0.543	0.549	0.555	0.514	0.517	0.516	0.511	0.516	0.534	0.528	0.549	0.555	0.512	0.513	0.533	0.573	0.483
Vulture						1	0.775	0.774	0.774	0.773	0.763	0.777	0.541	0.541	0.491	0.477	0.533	0.53	0.528	0.531	0.53	0.528	0.529	0.528	0.521	0.533	0.534	0.532	0.545	0.538	0.546	0.541	0.546	0.542	0.523	0.518	0.524	0.524	0.524	0.532	0.525	0.541	0.545	0.498	0.503	0.532	0.564	0.48
Glenn							1	0.964	0.963	0.958	0.786	0.806	0.542	0.538	0.494	0.487	0.523	0.52	0.519	0.518	0.521	0.521	0.518	0.521	0.517	0.525	0.538	0.549	0.532	0.533	0.531	0.51	0.542	0.544	0.512	0.517	0.514	0.513	0.513	0.526	0.529	0.544	0.548	0.51	0.504	0.529	0.561	0.49
Immaculata								1	0.95	0.96	0.783	0.803	0.544	0.538	0.491	0.488	0.524	0.521	0.522	0.522	0.521	0.522	0.521	0.521	0.522	0.527	0.548	0.547	0.533	0.534	0.531	0.513	0.54	0.549	0.514	0.516	0.514	0.514	0.514	0.522	0.528	0.537	0.548	0.518	0.505	0.525	0.566	0.485
Korra									1	0.955	0.789	0.803	0.546	0.54	0.497	0.484	0.528	0.523	0.526	0.524	0.526	0.525	0.522	0.525	0.528	0.53	0.536	0.539	0.544	0.541	0.543	0.53	0.543	0.538	0.518	0.517	0.52	0.52	0.52	0.514	0.525	0.545	0.544	0.516	0.515	0.53	0.567	0.481
RAP15										1	0.784	0.803	0.541	0.543	0.496	0.487	0.525	0.52	0.521	0.519	0.521	0.522	0.519	0.521	0.52	0.527	0.549	0.547	0.532	0.533	0.532	0.513	0.538	0.552	0.511	0.512	0.51	0.511	0.511	0.524	0.533	0.538	0.546	0.506	0.513	0.53	0.568	0.481
Joann											1	0.777	0.549	0.543	0.495	0.496	0.532	0.518	0.524	0.523	0.524	0.513	0.527	0.517	0.522	0.531	0.545	0.542	0.533	0.537	0.536	0.535	0.545	0.548	0.519	0.517	0.516	0.516	0.516	0.527	0.533	0.546	0.547	0.518	0.532	0.537	0.558	0.487
Wayne												1	0.538	0.545	0.49	0.489	0.532	0.546	0.547	0.54	0.548	0.545	0.543	0.545	0.541	0.534	0.538	0.535	0.523	0.532	0.525	0.529	0.539	0.541	0.511	0.509	0.509	0.508	0.508	0.535	0.525	0.55	0.544	0.534	0.512	0.532	0.572	0.476
Laroye													1	0.963	0.487	0.486	0.541	0.546	0.543	0.549	0.543	0.541	0.545	0.543	0.554	0.54	0.548	0.549	0.542	0.55	0.546	0.548	0.55	0.552	0.517	0.515	0.518	0.518	0.518	0.549	0.538	0.559	0.561	0.502	0.504	0.554	0.568	0.497
Salgado														1	0.479	0.486	0.542	0.55	0.547	0.552	0.551	0.543	0.546	0.546	0.552	0.539	0.549	0.547	0.545	0.55	0.548	0.543	0.551	0.549	0.512	0.512	0.516	0.516	0.516	0.548	0.532	0.554	0.563	0.505	0.516	0.548	0.557	0.491
Circum															1	0.926	0.496	0.503	0.502	0.498	0.504	0.502	0.502	0.502	0.499	0.498	0.493	0.488	0.492	0.491	0.491	0.483	0.493	0.497	0.489	0.496	0.499	0.496	0.496	0.485	0.488	0.5	0.49	0.595	0.59	0.495	0.484	0.511
Mudcat																1	0.483	0.495	0.495	0.483	0.495	0.498	0.49	0.486	0.482	0.484	0.491	0.48	0.484	0.483	0.486	0.491	0.482	0.495	0.498	0.501	0.51	0.507	0.507	0.484	0.48	0.491	0.486	0.596	0.588	0.486	0.496	0.499
Decurro																	1	0.985	0.985	0.993	0.984	0.983	0.984	0.983	0.984	1	0.529	0.515	0.533	0.506	0.52	0.518	0.527	0.517	0.52	0.512	0.512	0.517	0.517	0.532	0.535	0.529	0.536	0.52	0.504	0.53	0.532	0.491
Jessica																		1	1	0.984	0.999	0.998	0.998	0.998	0.989	0.985	0.518	0.51	0.534	0.51	0.525	0.519	0.524	0.518	0.518	0.518	0.518	0.517	0.517	0.532	0.531	0.529	0.534	0.511	0.496	0.532	0.526	0.499
Maggie																			1	0.984	0.999	0.998	0.998	0.998	0.989	0.985	0.517	0.507	0.536	0.513	0.527	0.52	0.517	0.522	0.508	0.519	0.516	0.514	0.515	0.535	0.526	0.532	0.535	0.508	0.497	0.537	0.535	0.495
Muttlie																				1	0.984	0.983	0.984	0.983	0.983	0.993	0.528	0.515	0.531	0.522	0.523	0.519	0.53	0.528	0.517	0.514	0.518	0.517	0.517	0.526	0.532	0.534	0.537	0.507	0.503	0.533	0.535	0.498
TymAbreu																					1	0.998	0.998	0.998	0.989	0.984	0.517	0.507	0.536	0.512	0.527	0.52	0.523	0.522	0.516	0.519	0.516	0.515	0.515	0.537	0.53	0.53	0.534	0.509	0.495	0.537	0.535	0.498
Moloch																						1	0.999	0.999	0.99	0.984	0.518	0.508	0.534	0.512	0.527	0.516	0.524	0.524	0.521	0.524	0.519	0.517	0.517	0.535	0.531	0.534	0.536	0.505	0.496	0.535	0.539	0.498
Sandman																							1	0.999	0.991	0.984	0.52	0.516	0.533	0.507	0.524	0.512	0.514	0.519	0.516	0.513	0.512	0.511	0.511	0.537	0.52	0.525	0.532	0.509	0.496	0.538	0.523	0.498
Stratus																								1	0.99	0.983	0.518	0.508	0.534	0.511	0.527	0.516	0.526	0.527	0.519	0.518	0.509	0.511	0.511	0.53	0.531	0.531	0.533	0.507	0.495	0.537	0.535	0.498
Toulouse																									1	0.984	0.515	0.513	0.534	0.514	0.526	0.52	0.525	0.527	0.523	0.525	0.52	0.518	0.518	0.532	0.542	0.53	0.537	0.499	0.497	0.534	0.539	0.499
Yank																										1	0.532	0.514	0.533	0.512	0.521	0.519	0.516	0.521	0.518	0.515	0.518	0.517	0.517	0.532	0.533	0.531	0.534	0.514	0.503	0.536	0.533	0.489
Brent																											1	0.92	0.759	0.756	0.758	0.738	0.546	0.544	0.513	0.513	0.515	0.514	0.514	0.576	0.586	0.547	0.55	0.49	0.511	0.529	0.563	0.495
Jawnski																												1	0.757	0.754	0.754	0.742	0.549	0.548	0.521	0.512	0.509	0.508	0.508	0.576	0.585	0.539	0.555	0.491	0.505	0.532	0.562	0.487
Martha																													1	0.922	0.975	0.797	0.548	0.545	0.524	0.518	0.518	0.519	0.519	0.564	0.574	0.534	0.537	0.499	0.509	0.533	0.552	0.48
Sonny																														1	0.929	0.789	0.544	0.539	0.533	0.521	0.522	0.53	0.53	0.569	0.569	0.54	0.542	0.496	0.496	0.518	0.548	0.477
TaeYoung																															1	0.793	0.548	0.542	0.524	0.522	0.523	0.524	0.524	0.569	0.569	0.542	0.539	0.496	0.503	0.527	0.553	0.48
BarretLemon																																1	0.53	0.531	0.513	0.512	0.51	0.51	0.51	0.566	0.57	0.533	0.533	0.503	0.511	0.518	0.558	0.479
Tank																																	1	0.973	0.516	0.511	0.52	0.52	0.52	0.551	0.541	0.553	0.561	0.49	0.501	0.534	0.564	0.491
Wilde																																		1	0.522	0.516	0.523	0.525	0.525	0.55	0.55	0.547	0.558	0.493	0.496	0.528	0.563	0.494
Amigo																																			1	0.961	0.967	0.967	0.967	0.508	0.511	0.521	0.518	0.512	0.504	0.515	0.519	0.5
Rings																																				1	0.97	0.968	0.968	0.513	0.517	0.513	0.525	0.513	0.496	0.502	0.515	0.497
Anansi																																					1	1	1	0.509	0.51	0.529	0.523	0.518	0.501	0.505	0.512	0.501
Gorgeous																																						1	1	0.509	0.51	0.53	0.525	0.516	0.502	0.506	0.508	0.501
Sorjuana																																							1	0.509	0.51	0.53	0.525	0.516	0.502	0.506	0.509	0.501
ArV1																																								1	0.786	0.546	0.554	0.495	0.5	0.538	0.555	0.484
PrincessTrina																																									1	0.545	0.551	0.494	0.493	0.545	0.565	0.485
KellEzio																																										1	0.959	0.503	0.514	0.538	0.547	0.505
Kitkat																																											1	0.506	0.501	0.542	0.55	0.505
CapnMurica																																												1	0.874	0.492	0.494	0.512
Gordon																																													1	0.506	0.499	0.516
ArV2																																														1	0.554	0.493
Galaxy																																															1	0.469
Jasmine																																																1
